# Supplementary material for: Detection of statistical asymmetries in non-stationary sign time series: Analysis of foreign exchange data
Source: PLOS journal article supplement (doi:10.1371/journal.pone.0177652), 2017-05-18
Supplement: S2 (10.1371/journal.pone.0177652.s002) [file journal.pone.0177652.s002]

# Detection of statistical asymmetries in non-stationary sign time series: Analysis of foreign exchange data

Arthur Matsuo Yamashita Rios de Sousa, Hideki Takayasu, Misako Takayasu

## Supporting information

### S2 Appendix. Normal approximation for the probability distribution of the number of pairs in a stationary Markov process.

The probability  $\mathcal{P}$  of a stationary sign binary Markov process  $\{\mu, \nu\}$  to generate a sequence with numbers of pairs  $N_{++}$ ,  $N_{+-}$ ,  $N_{-+}$ ,  $N_{--}$ , the first symbol  $s_1$  and the last symbol  $s_w$ , given length  $w$  and parametrized using  $N_+$  and  $N_{++}$ , is given by:

$$\mathcal{P} = \binom{N_+ - 1}{N_{++}} \binom{N_- - 1}{N_{--}} \times \frac{1}{\mu + \nu} (1 - \mu)^{N_{++}} \mu^{N_+ - N_{++} - \varepsilon(+,+) + \varepsilon(-,-)} \nu^{N_- - N_{--} + \varepsilon(+,+) - \varepsilon(-,-)} (1 - \nu)^{N_{--}}, \quad (1)$$

for  $0 < N_+ < w$ , with  $N_- = w - N_+$  and  $N_{--} = w - 2N_+ + N_{++} + \varepsilon(+,+) - \varepsilon(-,-)$ .

The above expression can be rearranged in order to explicit two terms resembling binomial distributions:

$$\mathcal{P} = \frac{\nu^{1+\varepsilon(+,+) - \varepsilon(-,-)} \mu^{1-\varepsilon(+,+) + \varepsilon(-,-)}}{\mu + \nu} \times \binom{N_+ - 1}{N_{++}} (1 - \mu)^{N_{++}} \mu^{N_+ - N_{++}} \binom{N_- - 1}{N_{--}} (1 - \nu)^{N_{--}} \nu^{N_- - N_{--}}. \quad (2)$$

Now we use the normal approximation for the binomial distribution:

$$\binom{n}{k} p^k (1 - p)^{n-k} \approx \frac{1}{\sqrt{2\pi np(1-p)}} \exp\left(-\frac{(k - np)^2}{2np(1-p)}\right). \quad (3)$$

And finally we obtain the approximate expression for the  $\mathcal{P}$ :

$$\mathcal{P} \approx \frac{\nu^{1+\varepsilon(+,+) - \varepsilon(-,-)} \mu^{1-\varepsilon(+,+) + \varepsilon(-,-)}}{\mu + \nu} \times \frac{1}{\sqrt{2\pi(N_+ - 1)\mu(1-\mu)}} \exp\left(-\frac{[N_{++} - (N_+ - 1)(1-\mu)]^2}{2(N_+ - 1)\mu(1-\mu)}\right) \times \frac{1}{\sqrt{2\pi(N_- - 1)\nu(1-\nu)}} \exp\left(-\frac{[(N_{--} - (N_- - 1)(1-\nu)]^2}{2(N_- - 1)\nu(1-\nu)}\right). \quad (4)$$
